# Web resources for rare auto-inflammatory diseases: towards a common patient registry

Isabelle Touitou<sup>1</sup>, Véronique Hentgen<sup>2</sup> and Isabelle Koné-Paut<sup>3</sup> on behalf of The French Reference Centre for Auto-Inflammatory Diseases

**Objectives.** To review information resources on rare auto-inflammatory disorders (AIDs) for use by health care professionals, focusing particularly on patient registries.

**Methods.** Using relevant key words, we surveyed the websites of several scientific societies of immunology, paediatrics and rheumatology, as well as Pubmed and specialized databases for AIDs.

**Results.** The Internet provides a wide variety of information related to AIDs. Moreover, several other initiatives have been undertaken to create new resources for professionals. We reviewed six patient registries for rare AIDs, taking a special interest in the submission questionnaire. We revealed a wide overlap between the items used in the questionnaires, whereas the currently available registries appeared inappropriate for AIDs patients with complex or undefined diagnosis.

**Conclusions.** AIDs share common clinical features, pathophysiological pathways and therapeutic approaches. Although several resources are now available for rare AIDs, a unique and dedicated site gathering all aspects of these diseases as a whole is still lacking, i.e. covering research as well as the needs of AIDs patients and health care professionals. Our study thus advocates a merging of existing patient registries or the creation of a common database.

**KEY WORDS:** Auto-inflammatory diseases, Web resources, Patient registry.

## Introduction

Hereditary auto-inflammatory diseases (AIDs) are recently recognized conditions caused by mutations in genes involved in the regulation of innate immunity [1]. These genes encode modulators of inflammatory signalling pathways and apoptosis [2]. They are also thought to act as susceptibility factors or modifiers in multifactorial AIDs, such as Behçet's disease. Several non-inherited conditions [i.e. Behçet's disease, the periodic fever, adenitis, pharyngitis and aphthosis (PFAPA) syndrome and chronic recurrent multifocal osteomyelitis], which are characterized by low auto-antibody titres and enhanced inflammatory response, which are compatible with the findings in other auto-inflammatory disorders. IL-1, a potent pyrogenic pro-inflammatory cytokine, is a common key factor found to be deregulated in AIDs [3]. Accordingly, fever and several types of clinical inflammation represent the main symptoms of these disorders, sometimes making a differential diagnosis challenging [4].

Soon after the cloning of the gene for the prototype disease FMF [5, 6], professionals interested in AIDs attempted to meet regularly and create web resources to facilitate communication. Since most AIDs are rare diseases, gathering material and patient data are essential in order to collect a sufficient mass of information for research purposes and improve patient care by rapid dissemination of educative papers. Several international websites mentioning our diseases of interest (Table 1) are available and can be classified into three different groups. The first group comprises generalist websites such as Orphanet [7], Online Mendelian Inheritance in Man (OMIM) [8] and Human Genome Mutation Database of Cardiff (HGMD) [9]. The second group of websites covers the medical specialities involved in AIDs, including European Society for Immunodeficiency

(ESID) [10] and Paediatric Rheumatology International Trials Organisation/Paediatric Rheumatology Society (PRINTO/PReS) [11]. The third group of websites encompass those specializing in AIDs, for example MetaFMF (FMF), HIDSnet (Hyper IgD Syndrome), PFAPA.net, International Society for Behçet's Disease (ISBD), Infervers [12] and International Society for Auto-Inflammatory Diseases (ISSAID). Cumulatively, these websites provide a variety of informative combinations, including descriptions of symptoms and gene mutations, as well as information for patients and health care professionals. However, taken individually, only HIDSnet covers all fields of AIDs.

To assess the relevance of existing initiatives, we reviewed the web and other types of resources currently available for rare AIDs, focusing on patient registries. Indeed, online patient databases represent a valuable tool in the estimation of disease incidence and prevalence, delineation of disease criteria and/or natural history, identification of phenotype–genotype correlations and evaluation of patient outcome. Analysis of their submission questionnaires highlighted a wide range of overlap and missing data. Furthermore, large numbers of patients could either be matched to more than one registry or fitted to none of them.

## Methods

We undertook different steps in this study. We first conducted an Internet-based survey on rare AIDs to review existing websites focusing on patient registries using three complementary approaches: (i) we visited websites of immunology, rheumatology and paediatric societies; (ii) we carried out searches on Pubmed and Google using key words corresponding to all hereditary AIDs, i.e. FMF, mevalonate kinase deficiencies (MKDs) consisting of two clinical components: HIDS and mevalonic aciduria (MA), cryopyrin-associated periodic syndrome (CAPS) consisting of three phenotypes: familial cold auto-inflammatory syndrome (FCAS), Muckle–Wells syndrome (MWS) and chronic infantile neurological cutaneous and articular syndrome (CINCA), as well as AIDs with unknown aetiology, PFAPA syndrome and Behçet's disease; and (iii) we also contacted members of ISSAID by e-mail to enquire whether they were aware of any existing registries for AIDs patients.

<sup>1</sup>CHRU Montpellier, Unité Médicale des Maladies Auto-inflammatoires, Hôpital A de Villeneuve, Montpellier, <sup>2</sup>CH Versailles, Service de Pédiatrie, Versailles and <sup>3</sup>CHU Kremlin-Bicêtre, Service de Pédiatrie Générale, Rhumatologie, Bicêtre, France.

Submitted 23 October 2008; revised version accepted 18 February 2009.

Correspondence to: Isabelle Touitou, CHRU Montpellier, Unité Médicale des Maladies Auto-inflammatoires, Hôpital A de Villeneuve, Montpellier, France.  
E-mail: isabelle.touitou@igh.cnrs.fr

TABLE 1. Currently available international web resources treating AIDs and their information content

|                                                                    | Website                                                                     | URL address                                                                                                     | Description of mutations | Description of symptoms | Information for patients | Information for health professionals |
|--------------------------------------------------------------------|-----------------------------------------------------------------------------|-----------------------------------------------------------------------------------------------------------------|--------------------------|-------------------------|--------------------------|--------------------------------------|
| Generalists                                                        | Orphanet                                                                    | <a href="http://www.orpha.net/">http://www.orpha.net/</a>                                                       | No                       | All diseases            | All diseases             | All diseases                         |
|                                                                    | OMIM                                                                        | <a href="http://www.ncbi.nlm.nih.gov/sites/entrez?db=omim">http://www.ncbi.nlm.nih.gov/sites/entrez?db=omim</a> | All diseases             | All diseases            | No                       | No                                   |
| Immunodeficiency (ID) and paediatric rheumatology (PR) specialties | HGMD                                                                        | <a href="http://www.hgmd.cf.ac.uk/">http://www.hgmd.cf.ac.uk/</a>                                               | All diseases             | No                      | No                       | No                                   |
|                                                                    | ESID                                                                        | <a href="http://www.esid.org/">http://www.esid.org/</a>                                                         | ID diseases              | ID diseases             | No                       | ID diseases                          |
| AIDs specialized                                                   | PRoS                                                                        | <a href="http://www.pros.org.uk/">http://www.pros.org.uk/</a>                                                   | No                       | No                      | No                       | PR diseases                          |
|                                                                    | PRINTO                                                                      | <a href="http://www.printo.it/">http://www.printo.it/</a>                                                       | No                       | PR diseases             | PR diseases              | PR diseases                          |
|                                                                    | MetaFMF                                                                     | <a href="http://fmf.igh.cnrs.fr/metaFMF/">http://fmf.igh.cnrs.fr/metaFMF/</a>                                   | FMF                      | FMF                     | No                       | No                                   |
|                                                                    | HIDSnet                                                                     | <a href="http://www.hids.net/">http://www.hids.net/</a>                                                         | HIDS                     | HIDS                    | HIDS                     | HIDS                                 |
|                                                                    | PFAPAnet                                                                    | <a href="http://www.pfapa.net/">http://www.pfapa.net/</a>                                                       | PFAPA                    | PFAPA                   | No                       | No                                   |
|                                                                    | ISBD                                                                        | <a href="http://www.behcet.ws/">http://www.behcet.ws/</a>                                                       | Not applicable           | Behçet's disease        | No                       | Behçet's disease                     |
|                                                                    | Infevers                                                                    | <a href="http://fmf.igh.cnrs.fr/ISSAID/infevers/">http://fmf.igh.cnrs.fr/ISSAID/infevers/</a>                   | All hereditary AIDs      | No                      | No                       | No                                   |
| ISSAID                                                             | <a href="http://fmf.igh.cnrs.fr/ISSAID/">http://fmf.igh.cnrs.fr/ISSAID/</a> | No                                                                                                              | No                       | No                      | All AIDs                 |                                      |

Then, we reviewed the variables incorporated in the registry patient-inclusion forms. The questionnaire items, defined as questions with the same meaning (for example, 'serositis in the joints' and 'arthritis') were listed for each disease. The cross-overlap between registries was estimated as the number of common items divided by the number of total items of the concerned registries, including epidemiological features.

Finally, we examined the literature content and the patients' medical charts recorded by the French Reference Centre for Auto-Inflammatory Diseases to identify patients eligible for more than one registry.

## Results

Several initiatives have been undertaken over the last decade to create patient registries focused on specific AIDs or their subtypes. Our survey retrieved six disease-specific registries eligible for the purpose of our study, the earliest and most complete being the Hyper-IgD and periodic fever syndrome registry, HIDSnet, coordinated by Dr A. Simon at <http://www.hids.net/>. This website contains everything about this rare disease with pages designed for physicians and scientists, as well as for patients, their families and others who may be interested. The professional page includes a definition of the disease, information on clinical, biochemical and genetic diagnosis, forms for inclusion of HIDS patients in the Nijmegen patient registry and links to research meetings and literature. The FMF registry created by the International Study Group for Phenotype-Genotype correlation in FMF (MetaFMF [13]) at <http://fmf.igh.cnrs.fr/metaFMF/index.html> and the PFAPA registry created by Dr M. Hofer at <http://www.pfapa.net/> only contains clinical and biological data about patients. The Behçet's disease registry by Prof I. Koné-Paut, the TRAPS registry (EuroTRAPS) by Dr M. Gattorno and Dr H. Lachmann, and the Blau syndrome registry by Prof. C. Rose and Prof. C. Wouters are each to be posted on the Internet shortly. The ESID at <http://www.esid.org/> also developed an online patient registry including a subgroup for AIDs patients, but their questionnaire only contains common items for immunodeficient patients, namely a core data set (epidemiological data), general diagnosis and quality of life items, medication, laboratory values and family history. As no AIDs-specific clinical form created by ESID existed at this time, we could not compare this registry to the others.

Since AIDs share many clinical and biological features, we analysed in detail all questions present in the submission questionnaires of these six registries in order to discriminate between those that were specific and common. We listed 130 items divisible into demographic, clinical and paraclinical categories. Five of the eight demographic items were common to all six questionnaires

(Fig. 1). Among the 130 recorded, the number of items per disease ranged from 32 (25%, Blau syndrome) to 69 (53%, PFAPA syndrome) (Fig. 2). Surprisingly, the 'mevalonic aciduria' and 'CARD15 mutation' variables specific to the HIDS and Blau syndromes, respectively were lacking in their corresponding registries, while the PFAPA registry contained both items. Cross-examination revealed that the PFAPA and TRAPS registry disclosed 44% of the items in common (Table 2). The TRAPS and Blau syndrome registries showed the least congruence.

In order to evaluate the number of patients potentially matching more than one registry, we reviewed the literature and clinical charts from our reference centre for complex cases. We identified 39 patients [14–31] with two mutated genes or fulfilling criteria for at least two diseases (Table 3). These cases could be included into more than one of the six registries described above.

## Discussion

This study revealed the availability of an increasing amount of information from various sources focused upon or supplying information on AIDs, in order to help clinicians, patients and health care individuals obtain the information, tools and support required to facilitate the effective management of these diseases. The resources analysed in this study demonstrated that each provided complementary information, but none centralized the entire specific details about rare AIDs to one single place. Most rare diseases are life-threatening and chronically debilitating, with the vast majority being genetically determined. Individually, their prevalences are low and so require specially combined efforts to allow disease analysis so as to improve diagnosis, care and prevention. Research in the field of rare AIDs would be significantly improved if a sufficient number of patients were accessible. Electronic patient registries can help provide the basis for this by collecting both retrospective and prospective data over a long period of time and integrating centres on a national or even international scale. We found six individual initiatives for patient registries entirely devoted to one AID, with three of them already available online. A thorough examination of their content demonstrated a particularly high rate of item overlap ranging from 18 to 44%, easily explained by the fact that AIDs belong to the same physiopathological group of diseases by definition. These databases proved very useful for preliminary studies on the clinical presentation of the patients [32], diagnostic value [21] and on risk factors for complications [33]. However, registries for several AIDs (e.g. CAPS) are still lacking, and patients with an undetermined phenotype or with multiple gene mutations would scarcely benefit from existing registries.

The very high overlap between the six registries analysed herein and the increasing number of unclassified patients advocates the

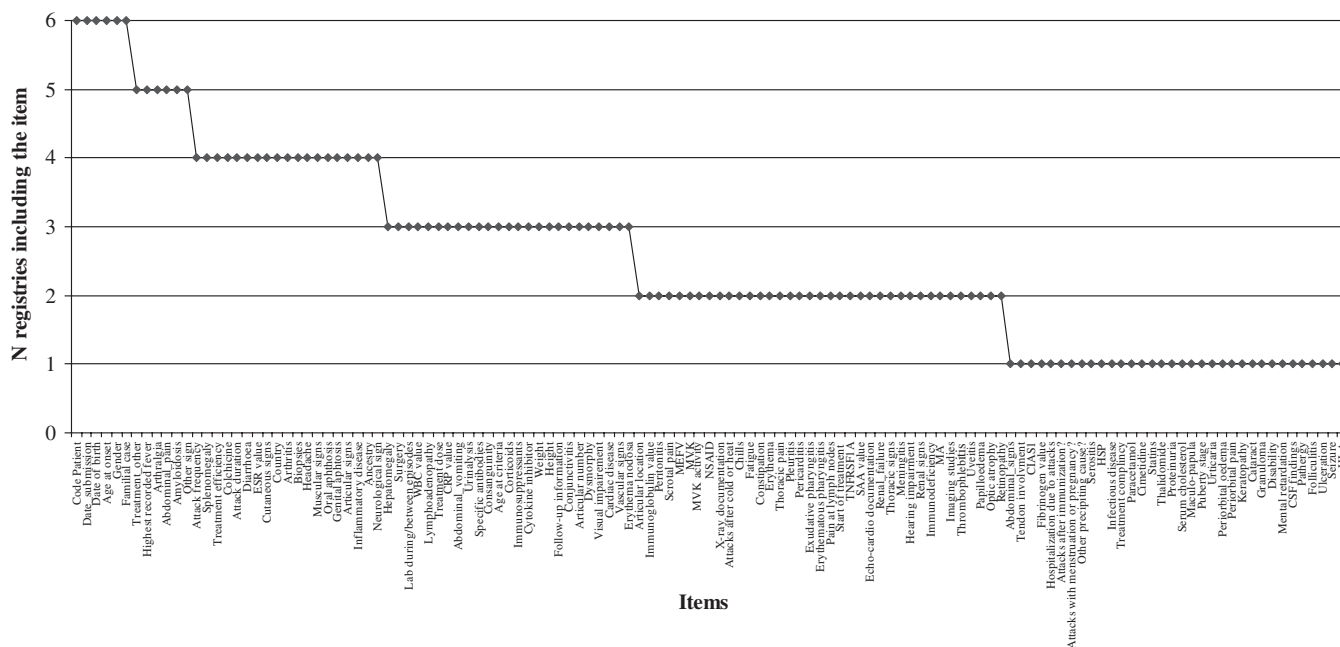

FIG. 1. Item frequency in six auto-inflammatory patient registries. The presence of each of the questionnaire items was searched for in each of the six registries evaluated in this study. Six of these items, such as patient date of birth, were found in all six questionnaires, while only 33 were found in a single registry.

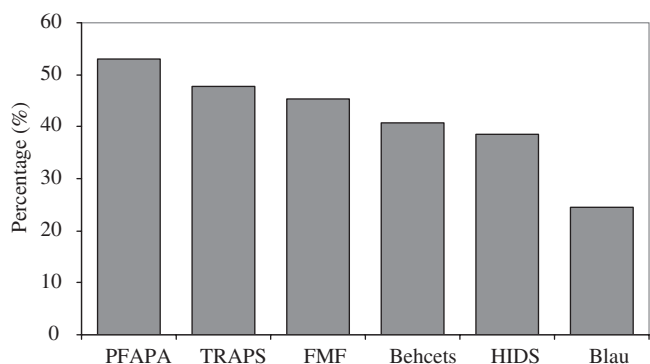

FIG. 2. Percentage of items present in each registry among the 130 recorded. The presence of each of the questionnaire items was searched for in each of the six registries evaluated in this study. The PFAPA registry included 53% ( $n=69$ ) of the 130 items, while the Blau registry included 25% ( $n=33$ ).

TABLE 2. Cross-overlap among the six registries

|                  | PFAPA (%) | FMF (%)   | TRAPS (%) | HIDS (%) | Behçet's disease (%) | Blau syndrome (%) |
|------------------|-----------|-----------|-----------|----------|----------------------|-------------------|
| PFAPA            | 100       |           |           |          |                      |                   |
| FMF              | 35        | 100       |           |          |                      |                   |
| TRAPS            | <b>44</b> | <b>38</b> | 100       |          |                      |                   |
| HIDS             | 43        | 36        | 32        | 100      |                      |                   |
| Behçet's disease | 34        | 26        | 26        | 21       | 100                  |                   |
| Blau syndrome    | 22        | 21        | <b>18</b> | 21       | 31                   | 100               |

Values in bold indicate diseases with the two extreme percentages of overlap.

creation of a central database for all rare AIDs, especially those with a paediatric onset. We feel that it is possible to have a global rather than a piecemeal approach to the registration of AIDs patients. Although incorporation of 130 variables is technically feasible, one may question the relevance of accumulating so many pieces of information for each disease. To circumvent this,

we propose that this common patient registry would consist of a core data set including stable lifelong data, i.e. epidemiological and genetic data. This module would be connected to various specific disease forms according to the initial diagnosis. Several items in each form would be common to more than one disease. The editor of the disease initially diagnosed, e.g. the registry creators aforementioned, would validate each patient's data. Each physician would have secured access to the data she/he contributed.

One of the major problems related to a unique registry is the extremely wide spectrum of the clinical manifestations associated with the different AIDs. Is it therefore possible that the number of non-overlapping items significantly increases when other AIDs (*NLRP3*- and *NALRP12*-related conditions, PAPA syndrome, Majeeed's syndrome and chronic recurrent multifocal osteomyelitis) are considered? Moreover, some of these conditions display a prevalent chronic course, whereas others have a recurrent or periodic behaviour. These issues may raise possible practical and technical implications; however, we believe that follow-up and specific projects could be integrated over time.

The advantages of a centralized database are substantial. Heavily solicited clinicians could be kept motivated with a single URL, a single questionnaire or a single submission, even if the diagnosis of the patient was to be later refined. A unique registry would not completely solve the problem of the correct classification of patients with multiple possible diagnoses, but we believe that it would help delineate phenotype-genotype correlations, identify oligogenic transmission and possibly provide better targeted therapeutics to patients. In order to obtain reliable statistics, homogeneous data must be longitudinally (many items in a single disease) or transversely (a single item across different diseases) correlated. The prevalence of each disease among the AIDs group could then be compared accurately. Time and money could be saved. Such a project is under consideration by members of the ISSAID society. The PRoS network and the reference centres for AIDs are a potential source of data for epidemiological and clinical research, and the PRINTO group has the facilities to collect data from established registries across countries with minimal additional infrastructure, using a web-based system.

TABLE 3. Cases eligible for more than one AIDs patient registry

| Reference | Phenotype    | Genotype <sup>a</sup> |             |          |       | Possible registries | Patient's origin and clinical information                                                                                                                                                                                   |
|-----------|--------------|-----------------------|-------------|----------|-------|---------------------|-----------------------------------------------------------------------------------------------------------------------------------------------------------------------------------------------------------------------------|
|           |              | MEFV                  | MVK         | TNFRSF1A | NLRP3 |                     |                                                                                                                                                                                                                             |
| [25]      | Behçet's     | E148Q/M694V           |             |          |       | Behçet's or FMF     | Non-Ashkenazi Jew, oral aphthosis, erythema nodosum, non-febrile arthralgia                                                                                                                                                 |
| [25]      | Behçet's     | E148Q/M694V           |             |          |       | Behçet's or FMF     | Non-Ashkenazi Jew, oral aphthosis, erythema nodosum, non-febrile arthralgia                                                                                                                                                 |
| [25]      | Behçet's     | E148Q/M694V           |             |          |       | Behçet's or FMF     | Non-Ashkenazi Jew, oral aphthosis, folliculitis, non-febrile arthralgia                                                                                                                                                     |
| [29]      | Behçet's     |                       | V377I/S135L |          |       | Behçet's or HIDS    | French, fever: 40°C, chills/monthly, headaches, bipolar aphthosis, erythema nodosum, severe acne, conjunctivitis, abdominal pain, diarrhoea, transient arthralgia, arthritis, febrile and skin reaction after immunizations |
| [29]      | Behçet's     |                       | V377I/V377I |          |       | Behçet's or HIDS    | French, fever, bipolar aphthosis, macular rash, skin hypersensitivity, erythema nodosum, keratitis, transient arthralgia                                                                                                    |
| [31]      | Behçet's     |                       |             | R92Q     |       | Behçet's or TRAPS   | In a series of 74 unrelated European patients with Behçet's disease, 5 (6.8%) carried R92Q                                                                                                                                  |
| [29]      | Behçet's     |                       |             |          | V198M | Behçet's or CAPS    | French, buccal aphthosis, skin aphthosis, erythema nodosum, uveitis, venous thrombosis, ulcerative colitis, transient arthralgia                                                                                            |
| [17]      | CAPS         |                       |             | R92Q     | A439V | CAPS or TRAPS       | French, recurrent fever, urticaria                                                                                                                                                                                          |
| [15]      | FMF          | E148Q                 |             | R92Q     |       | FMF or TRAPS        | Italian, recurrent fever, abdominal attacks lasting 2–3 days, poor response to colchicine, attacks controlled by steroids                                                                                                   |
| PC        | FMF          | M694V/M680I           |             | R92Q     |       | FMF or TRAPS        | Non-Ashkenazi Jewish. Fever, good response to colchicine                                                                                                                                                                    |
| [15]      | FMF          | V726A                 |             | R92Q     |       | FMF or TRAPS        | Italian, atypical FMF but good response to colchicine                                                                                                                                                                       |
| PC        | FMF          | M680I                 |             | R92Q     |       | FMF or TRAPS        | Italian, recurrent fever, abdominal pain, erysipelas, since the age of 5 years                                                                                                                                              |
| [18]      | FMF          | M694V/M694V           |             |          | V198M | FMF or CAPS         | Turkish, FMF patient with amyloidosis                                                                                                                                                                                       |
| PC        | FMF          | P283L                 | V377I       |          |       | FMF or HIDS         | Magrebbian, recurrent fever, abdominal pain                                                                                                                                                                                 |
| [23]      | FMF/Behçet's | V726A/V726A           |             |          |       | Behçet's or FMF     | Arab, Behçet's criteria, episodic peritonitis with fever and arthritis                                                                                                                                                      |
| [23]      | FMF/Behçet's | E148Q/E148Q           |             |          |       | Behçet's or FMF     | Arab, Behçet's criteria, episodic peritonitis with fever and arthritis                                                                                                                                                      |
| [24]      | FMF/Behçet's | E148Q/M694I           |             |          |       | Behçet's or FMF     | Japanese, multiple buccal aphthoses, genital ulcers and iridouveitis, attacks of fever and thoracoabdominal pain, lasting for 1–2 weeks, good response to colchicine                                                        |
| [30]      | FMF/CAPS     | E148Q; I692del/V726A  |             |          | V198M | FMF or CAPS         | Anaemia, splenomegaly, bilateral sensorineural deafness, recurrent abdominal pain and fever, arthritis, renal amyloidosis                                                                                                   |
| [28]      | FMF/TRAPS    | M694V/M694V           |             | R92Q     |       | FMF or TRAPS        | Armenian/Italian, fever, arthritis, erysipela-like rash, conjunctivitis, peri-orbital oedema, flare duration 4–12 days, poor response to colchicine, good response to steroids                                              |
| [21]      | HIDS         | E148Q                 | P167L/I268T |          |       | FMF or HIDS         | Dutch, classical HIDS                                                                                                                                                                                                       |
| [21]      | HIDS         | V726A                 | V377I/V377I |          |       | FMF or HIDS         | Armenian, monthly attacks of fever, arthralgia, abdominal pain, oral ulcers, erythema rash which lasts for 4–6 days. No response to colchicine                                                                              |
| [21]      | HIDS         |                       | V377I/I268T | R92Q     |       | HIDS or TRAPS       | Dutch, classical HIDS                                                                                                                                                                                                       |
| [19]      | HIDS         |                       | V377I/S378P | R92Q     |       | HIDS or TRAPS       | Gerrman, chills, vomiting, arthralgia, cervical and inguinal adenopathy, fever, mild elevation of IgD                                                                                                                       |
| [20]      | PFAPA        |                       |             | R92Q     |       | PFAPA or TRAPS      | Periodic fever, recurrent pharyngitis, cervical adenopathy, aphthous ulcers, severe flank pain, myalgia, conjunctivitis, abdominal pain and vomiting, prednisone effective                                                  |
| PC        | PFAPA        |                       |             | R92Q     |       | PFAPA or TRAPS      | Magrebbian, recurrent fever, oral aphthosis, pharyngitis, cervical adenopathy, lasting 5–6 days, abdominal pain, cortisone responsive                                                                                       |
| [21]      | TRAPS        | E148Q                 |             | D93E     |       | TRAPS or FMF        | Dutch, clinical TRAPS                                                                                                                                                                                                       |
| PC        | Unclassified | E148Q                 | V377I       |          |       | FMF or HIDS         | Magrebbian/French, recurrent fever lasting 7 days, arthralgia, myalgia, aphthosis, oedema, urticaria, good response to cortisone                                                                                            |
| PC        | Unclassified | K695R                 | V377I/V377I |          |       | FMF or HIDS         | French, recurrent fever, urticaria, abdominal pain, arthralgia, conjunctivitis, lasting 3 days                                                                                                                              |
| [27]      | Unclassified | E148Q                 |             | R92Q     |       | TRAPS or FMF        | Asymptomatic apart from AA renal amyloidosis                                                                                                                                                                                |
| PC        | Unclassified | M694V                 |             | R92Q     |       | TRAPS or FMF        | Non-Ashkenazi Jewish. Fever, articular, thoracic and abdominal pain before the age of 10 years                                                                                                                              |
| PC        | Unclassified | E148Q                 |             | R92Q     |       | TRAPS or FMF        | Magrebbian, fever with aphthosis, lasting 5 days, response to cortisone                                                                                                                                                     |
| [16]      | Unclassified |                       | V377I/G211A | P46L     |       | HIDS or TRAPS       | Caucasian, Afro-Caribbean, clinical signs of HIDS, severe abdominal pain, altered shedding of the TNFR, response to etanercept                                                                                              |
| [22]      | Unclassified |                       | V377I       | R92Q     |       | HIDS or TRAPS       | English/German, mild symptoms of HIDS and good response to steroids                                                                                                                                                         |
| [26]      | Unclassified |                       |             | R92Q     | V198M | CAPS or TRAPS       | French, urticaria and oedema precipitated by heat and water, lasting a few hours, moderate fever, symmetric arthralgia, bipolar aphthosis, intense fatigue and conjunctivitis                                               |
| [14]      | Unclassified | E148Q                 |             |          | V198M | CAPS or FMF         | British, unclassified systemic inflammatory disease                                                                                                                                                                         |

PC: personal communications from R. Manna, V. Hentgen, I. Touitou, L. Federicci. <sup>a</sup>Usual names were used (as recorded in Infevers <http://fmf.igh.cnrs.fr/ISSAID/infevers/>; [12]).

### Rheumatology key messages

- Valuable sources of information for rare AIDs were identified (websites, scientific societies).
- Efforts are still needed to optimize these new resources, e.g. a common patient registry.

### Acknowledgements

We thank Angloscribe (Clarensac, France) for the English editing of the manuscript.

**Funding:** This work was supported by the French Ministry of Health programme of rare diseases, and the Coordination Theme 1 (Health) of the European Community's FP7.

**Disclosure statement:** The authors have declared no conflicts of interest.

### References

- Church LD, Churchman SM, Hawkins PN, McDermott MF. Hereditary auto-inflammatory disorders and biologics. *Springer Semin Immunopathol* 2006;27:494–508.
- Simon A, van der Meer JW. Pathogenesis of familial periodic fever syndromes or hereditary autoinflammatory syndromes. *Am J Physiol Regul Integr Comp Physiol* 2007;292:R86–98.
- Petrilli V, Martinon F. The inflammasome, autoinflammatory diseases, and gout. *Joint Bone Spine* 2007;74:571–6.
- Ryan JG, Goldbach-Mansky R. The spectrum of autoinflammatory diseases: recent bench to bedside observations. *Curr Opin Rheumatol* 2008;20:66–75.
- The French FMF Consortium. A candidate gene for familial Mediterranean fever. *Nat Genet* 1997;17:25–31.
- The International FMF Consortium. Ancient missense mutations in a new member of the RoRet gene family are likely to cause familial Mediterranean fever. *Cell* 1997;90:797–807.
- Ayme S. [Orphanet, an information site on rare diseases]. *Soins* 2003;672:46–7.
- Hamosh A, Scott AF, Amberger JS, Bocchini CA, McKusick VA. Online Mendelian Inheritance in Man (OMIM), a knowledgebase of human genes and genetic disorders. *Nucleic Acids Res* 2005;33:D514–7.
- Cooper DN, Stenson PD, Chuzhanova NA. The Human Gene Mutation Database (HGMD) and its exploitation in the study of mutational mechanisms. *Curr Protoc Bioinformatics* 2006, Chapter 1:Unit 1.13.
- Guzman D, Veit D, Knerr V *et al.* The ESID online database network. *Bioinformatics* 2007;23:654–5.
- Ruperto N, Garcia-Munitis P, Villa L *et al.* PRINTO/PReS international website for families of children with rheumatic diseases: [www.pediatric-rheumatology.printo.it](http://www.pediatric-rheumatology.printo.it). *Ann Rheum Dis* 2005;64:1101–6.
- Milhavet F, Cuisset L, Hoffman HM *et al.* The Infervers Autoinflammatory Mutation Online registry: update with new genes and functions. *Hum Mutat* 2008;29:803–8.
- Pugnere D, Ruiz M, Sarrauste de Menthiere C, Masdoua B, Demaille J, Touitou I. The MetaFMF website: a high quality tool for meta-analysis of FMF. *Nucleic Acids Res* 2003;31:286–90.
- Bybee B, Booth D, Rowczenio D, Lachmann H, Hawkins P. Findings of a MEFV screening program in a British center. *Clin Exp Rheumatol* 2002;20:S91.
- Obici L, Palladini G, Marciano S, Massa M, Zoppo M, Merlini G. Molecular characterization of tumor necrosis factor receptor associated periodic syndrome (TRAPS) in Italy: identification of novel and recurrent mutations and evidence for a high frequency of the R92Q allele in the Italian population. *Clin Exp Rheumatol* 2002;20:S76.
- Arkwright PD, McDermott MF, Houten SM *et al.* Hyper IgD syndrome (HIDS) associated with in vitro evidence of defective monocyte TNFRSF1A shedding and partial response to TNF receptor blockade with etanercept. *Clin Exp Immunol* 2002;130:484–8.
- Touitou I, Notarnicola C, Grandemange S. Identifying mutations in autoinflammatory diseases: towards novel genetic tests and therapies? *Am J Pharmacogenomics* 2004;4:109–18.
- Aganna E, Hawkins PN, Ozen S *et al.* Allelic variants in genes associated with hereditary periodic fever syndromes as susceptibility factors for reactive systemic AA amyloidosis. *Genes Immun* 2004;5:289–93.
- Hoffmann F, Lohse P, Stojanov S *et al.* Identification of a novel mevalonate kinase gene mutation in combination with the common MVK v377i substitution and the low-penetrance TNFRSF1A R92Q mutation. *Eur J Hum Genet* 2005;13:510–2.
- Saulsbury FT, Wispelwey B. Tumor necrosis factor receptor-associated periodic syndrome in a young adult who had features of periodic fever, aphthous stomatitis, pharyngitis, and adenitis as a child. *J Pediatr* 2005;146:283–5.
- Simon A, van der Meer JW, Vesely R *et al.* Approach to genetic analysis in the diagnosis of hereditary autoinflammatory syndromes. *Rheumatology* 2006;45:269–73.
- Stojanov S, Lohse P, Hoffmann F *et al.* Molecular analysis of the mvk and TNFRSF1A genes in patients with a clinical presentation typical of the hyperimmunoglobulinemia D with periodic fever syndrome: a low-penetrance TNFRSF1A variant in a heterozygous MVK carrier possibly influences the phenotype of hyperimmunoglobulinemia D with periodic fever syndrome or vice versa. *Arthritis Rheum* 2004;50:1951–8.
- Ben-Chetrit E, Cohen R, Chajek-Shaul T. Familial Mediterranean fever and Behcet's disease—are they associated? *J Rheumatol* 2002;29:530–4.
- Matsuda M, Nakamura A, Tsuchiya S, Yoshida T, Horie S, Ikeda S. Coexistence of familial Mediterranean fever and Behcet's disease in a Japanese patient. *Intern Med* 2006;45:799–800.
- Rabinovich E, Shinar Y, Leiba M, Ehrenfeld M, Langevitz P, Livneh A. Common FMF alleles may predispose to development of Behcet's disease with increased risk for venous thrombosis. *Scand J Rheumatol* 2007;36:48–52.
- Touitou I, Perez C, Dumont B, Federici L, Jorgensen C. Refractory auto-inflammatory syndrome associated with digenic transmission of low-penetrance tumour necrosis factor receptor-associated periodic syndrome and cryopyrin-associated periodic syndrome mutations. *Ann Rheum Dis* 2006;65:1530–1.
- Cigni A, Ledda F, Satta AE. A complex case of renal amyloidosis with a rare co-occurrence of 2 mutations in separate hereditary periodic fever syndrome-related genes. *J Nephrol* 2006;19:543–9.
- Granel B, Serratrice J, Dode C, Grateau G, Disdier P, Weiller PJ. Overlap syndrome between FMF and TRAPS in a patient carrying MEFV and TNFRSF1A mutations. *Clin Exp Rheumatol* 2007;25:S93–5.
- Kone-Paut I, Sanchez E, Le Quellec A, Manna R, Touitou I. Autoinflammatory gene mutations in Behcet's disease. *Ann Rheum Dis* 2007;66:832–4.
- Singh-Grewal D, Chaitow J, Aksentijevich I, Christodoulou J. Coexistent MEFV and CIAS1 mutations manifesting as familial Mediterranean fever plus deafness. *Ann Rheum Dis* 2007;66:1541.
- Amoura Z, Dode C, Hue S *et al.* Association of the R92Q TNFRSF1A mutation and extracranial deep vein thrombosis in patients with Behcet's disease. *Arthritis Rheum* 2005;52:608–11.
- Rose CD, Wouters CH, Meiorin S *et al.* Pediatric granulomatous arthritis: an international registry. *Arthritis Rheum* 2006;54:3337–44.
- Touitou I, Sarkisian T, Medlej-Hashim M *et al.* Country as the primary risk factor for renal amyloidosis in familial Mediterranean fever. *Arthritis Rheum* 2007;56:1706–12.
